# Supplementary material
Source: HighWire-hosted journal article supplement (https://www.canjsurg.ca/highwire/filestream/97883/field_highwire_adjunct_files/0/CJS-023120-at-1.pdf)
Supplement: CJS-023120-at-1.pdf [file CJS-023120-at-1.pdf]

DOI: 10.1503/cjs.023120

Online appendices are unedited and posted as supplied by the authors.

**Appendix 1. Survival analysis of liver recipients stratified by donor anticoagulation practices.**

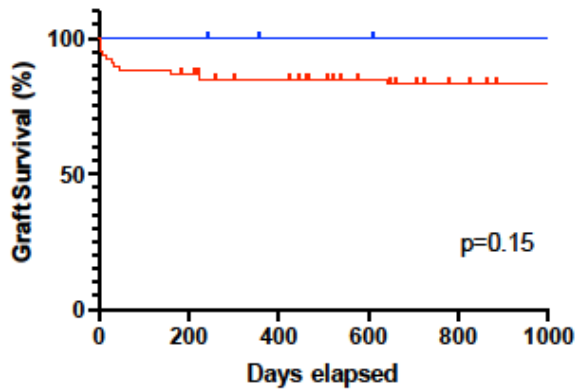

— Heparin  
— No Heparin

|            | 0  | 200 | 400 | 600 | 800 | 1000 |
|------------|----|-----|-----|-----|-----|------|
| Heparin    | 66 | 58  | 52  | 44  | 38  | 35   |
| No Heparin | 9  | 9   | 8   | 8   | 7   | 7    |

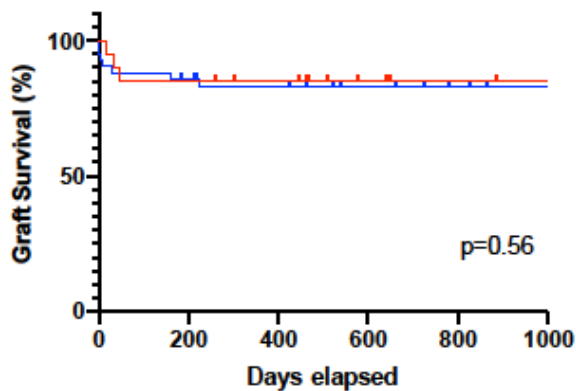

— Heparin at Withdrawal of Life-Sustaining Measures  
— Heparin at Onset Hypoxemia/Hypotension

|         | 0  | 200 | 400 | 600 | 800 | 1000 |
|---------|----|-----|-----|-----|-----|------|
| Earlier | 20 | 18  | 16  | 12  | 10  | 9    |
| Later   | 42 | 36  | 32  | 28  | 25  | 23   |

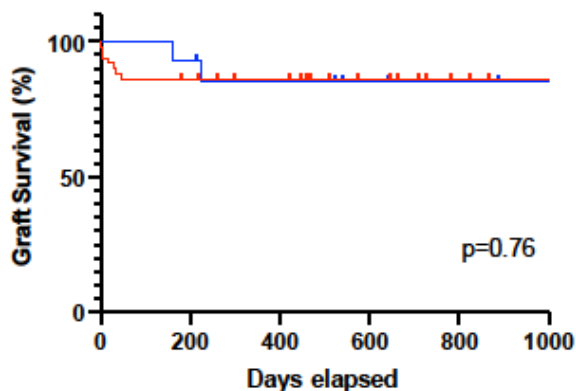

— Heparin Dose  $\geq$  300 units / kg  
— Heparin Dose < 300 units / kg

|           | 0  | 200 | 400 | 600 | 800 | 1000 |
|-----------|----|-----|-----|-----|-----|------|
| High Dose | 51 | 43  | 39  | 33  | 28  | 26   |
| Low Dose  | 14 | 14  | 12  | 10  | 9   | 8    |
